# Supplementary material
Source: publisher figshare collection journal article supplement (https://karger.figshare.com/articles/dataset/_/8223551)
Supplement: Supplementary file 1 [file 1]

---

**Supplemental Table 1. ICD-9 and CCS codes for psoriasis and mental health disorders.**

---

| Diagnosis                                                                            | Codes   |
|--------------------------------------------------------------------------------------|---------|
| Psoriasis                                                                            | 696.1   |
| Alopecia areata                                                                      | 704.01  |
| Hidradenitis suppurativa                                                             | 705.83  |
| Anxiety disorders                                                                    | CCS 651 |
| Schizophrenia and other<br>psychotic disorders                                       | CCS 659 |
| Personality disorders                                                                | CCS 658 |
| Depression and mood disorders                                                        | CCS 657 |
| Attention-Deficit/Hyperactivity Disorder, conduct, and disruptive behavior disorders | CCS 652 |
| Disorders usually diagnosed in infancy, childhood or adolescence                     | CCS 655 |
| Substance-related disorders                                                          | CCS 661 |
| Suicide and intentional self-inflicted injury                                        | CCS 662 |
| History of mental health and substance<br>abuse codes                                | CCS 663 |
| Alcohol-related disorders                                                            | CCS 660 |
| Adjustment disorders                                                                 | CCS 650 |
| Cognitive disorders, including delirium, dementia, amnestic and other                | CCS 653 |
| Developmental disorders                                                              | CCS 654 |
| Impulse control disorders                                                            | CCS 656 |

---

**Supplemental Table 2. Cost of care (COC) and length of stay (LOS) of hospitalization for mental health disorders in children with psoriasis**

| Mental health disorder                                                              | Diagnosis of psoriasis |                              |                      |                        |                                |                                            |
|-------------------------------------------------------------------------------------|------------------------|------------------------------|----------------------|------------------------|--------------------------------|--------------------------------------------|
|                                                                                     | No                     |                              | Yes                  |                        |                                | Excess mean annual cost of hospitalization |
|                                                                                     | Mean LOS (days)        | Mean cost of hospitalization | Mean LOS (days)      | Excess mean annual LOS | Mean cost of hospitalization   |                                            |
|                                                                                     | [95% CI]               | [95% CI]                     | [95% CI]             |                        | [95% CI]                       |                                            |
| Anxiety Disorders                                                                   | 7.32<br>[6.99-7.65]    | \$8,697<br>[\$8,374-\$9,560] | 6.91<br>[6.30-7.53]  | 22.75                  | \$6,423<br>[\$5,716-\$7,129]   | \$213,291                                  |
| Schizophrenia and other psychotic disorders                                         | 10.52<br>[9.74-11.30]  | \$9,063<br>[\$8,386-\$9,739] | 7.58<br>[2.51-12.65] | 4.96                   | \$10,955<br>[\$9,258-\$12,652] | \$78,899                                   |
| Personality disorders                                                               | 8.11<br>[7.48-8.74]    | \$6,548<br>[\$6,046-\$7,051] | 6.31<br>[0.12-12.49] | 3.33                   | \$5,491<br>[\$0-\$13,853]      | \$27,983                                   |
| Depression and mood disorders                                                       | 6.94<br>[6.60-7.28]    | \$6,521<br>[\$6,164-\$6,879] | 5.59<br>[5.48-5.70]  | 6,002                  | \$10,053<br>[\$9,831-\$10,275] | \$110,441,358                              |
| Attention-Deficit/Hyperactivity Disorder, conduct and disruptive behavior disorders | 6.79<br>[6.30-7.24]    | \$7,221<br>[\$6,828-\$7,615] | 6.61<br>[5.93-7.28]  | 39.09                  | \$8,602<br>[\$7,884-\$9,320]   | \$458,030                                  |
| Disorders usually diagnosed in infancy, childhood, or adolescence                   | 6.57<br>[6.12-7.04]    | \$8,806<br>[\$8,315-\$9,297] | 5.35<br>[4.93-5.76]  | 8.46                   | \$4,562<br>[\$3,977-\$5,147]   | \$72,076                                   |
| Substance-related disorders                                                         | 5.61<br>[5.53-5.69]    | \$8,869<br>[\$8,685-\$9,054] | 8.79<br>[7.63-9.96]  | 34.16                  | \$7,611<br>[\$6,363-\$8,859]   | \$301,656                                  |
| Suicide and intentional self-inflicted injury                                       | 6.30<br>[6.00-6.59]    | \$5,035<br>[\$4,721-\$5,349] | 6.70<br>[6.10-7.31]  | 13.21                  | \$5,117<br>[\$4,670-\$5,473]   | \$109,196                                  |

|                                                                |              |                     |              |        |                    |             |
|----------------------------------------------------------------|--------------|---------------------|--------------|--------|--------------------|-------------|
| History of mental health and<br>substance abuse codes          | 6.03         | \$6,595             | 7.39         | 15.57  | \$6,119            | \$138,010   |
|                                                                | [5.69-6.37]  | [\$6,278-\$6,912]   | [6.86-7.92]  |        | [\$4,138-\$8,111]  |             |
| Alcohol-related disorders                                      | 6.33         | \$7,129             | 7.67         | 185.89 | \$4,659            | \$3,481,776 |
|                                                                | [5.71-6.94]  | [\$6,729-\$7,528]   | [6.37-8.96]  |        | [\$4,610-\$4,708]  |             |
| Adjustment disorders                                           | 6.64         | \$11,425            | 8.68         | 7.44   | \$12,031           | \$109,274   |
|                                                                | [6.15-7.13]  | [\$9,818-\$13,031]  | [4.77-12.59] |        | [\$3,447-\$20,614] |             |
| Delirium, dementia, amnestic, and<br>other cognitive disorders | 8.74         | \$19,332            | 27.31 [NE]   | 7.19   | \$42,873           | \$124,195   |
|                                                                | [7.54-9.95]  | [\$16,323-\$22,342] |              |        | [NE]               |             |
| Developmental disorders                                        | 6.92         | \$14,402            | 6.08         | 21.19  | \$9,960            | \$339,385   |
|                                                                | [6.54-7.30]  | [\$13,478-\$15,326] | [4.35-7.81]  |        | [\$6,149-\$13,770] |             |
| Impulse control disorders                                      | 9.33         | \$6,139             | 12.75        | 9.20   | \$9,090            | \$65,983    |
|                                                                | [8.62-10.04] | [\$5,649-\$6,629]   | [NE]         |        | [NE]               |             |
| Miscellaneous mental health<br>disorders                       | 7.29         | \$10,355            | 5.38         | 5.66   | \$6,590            | \$73,179    |
|                                                                | [6.54-8.05]  | [\$8,318-\$12,391]  | [1.71-9.05]  |        | [\$5,981-\$7,199]  |             |
| <b>Any mental health disorder</b>                              | 7.08         | \$10,352            | 6.80         | 129.59 | \$8,358            | \$1,610,860 |
|                                                                | [6.84-7.32]  | [\$9,744-\$10,960]  | [6.11-7.49]  |        | [\$6,939-\$9,777]  |             |
